# Supplementary material for: Insightful vibrational imaging study on the hydration mechanism of carbamazepine
Source: Royal Society of Chemistry journal article supplement (doi:10.1039/d2cp02185d), 2022-01-01
Supplement: d2cp02185d1.pdf [file d2cp02185d1.pdf]

## Supporting information

### **Insightful vibrational imaging study on the hydration mechanism of carbamazepine**

Sara Fateixa<sup>\*a</sup>, Helena I. S. Nogueira<sup>a</sup>, José A. Paixão<sup>b</sup>, Rui Fausto<sup>c</sup>, Tito Trindade<sup>\*a</sup>

<sup>a</sup>*Department of Chemistry and CICECO-Aveiro Institute of Materials, University of Aveiro, 3810-193 Aveiro, Portugal*

<sup>b</sup>*FisUC, Department of Physics, University of Coimbra, P-3004-516 Coimbra, Portugal*

<sup>c</sup>*CQC-IMS, Department of Chemistry, University of Coimbra, P-3004-535 Coimbra, Portugal*

*\* sarafateixa@ua.pt; tito@ua.pt*

**Table S1:** Experimental Raman data and respective band assignments of CBZ III and CBZ DH.<sup>1,2</sup>

| CBZ III | CBZ DH | Assignments                                                                 |
|---------|--------|-----------------------------------------------------------------------------|
| 1624    | 1626   | $\nu(\text{C}=\text{C})$ non-aromatic                                       |
| 1601    | 1501   | $\delta(\text{N-H})$                                                        |
| 1590    | ----   | $\nu(\text{C}=\text{C})$ aromatic                                           |
| 1566    | 1568   | $\nu(\text{C}=\text{C})$ aromatic                                           |
| 1490    | 1495   | $\nu_{\text{sym}}(\text{C}=\text{C})$ , aromatic/ $\nu(\text{N-H})$         |
| 1413    | 1407   | $\nu(\text{C}=\text{C})/\delta(\text{CH})$                                  |
| 1309    | 1309   | $\delta(\text{CH})$ non-aromatic, in-plane                                  |
| ----    | 1259   | $\nu(\text{C}=\text{C})$                                                    |
| 1250    | -----  | $\nu(\text{N-H})$                                                           |
| 1222    | 1220   | $\nu(\text{N-H})$ amide                                                     |
| 1208    | 1205   | $\nu(\text{C}-\text{C})$ ring                                               |
| 1161    | 1160   | $\nu_{\text{asym}}(\text{C}-\text{C})$ ring/ $(\text{C}-\text{N}-\text{C})$ |
| 1120    | 1117   | $\rho(\text{NH}_2)$                                                         |
| 1042    | 1044   | $\delta(\text{C}-\text{H})$ aromatic, in-plane                              |
| 1026    | 1024   | $\delta(\text{C}-\text{H})$ aromatic, in-plane                              |
| 988     | ----   | $\nu(\text{C}-\text{N})$                                                    |
| 950     | -----  | $\delta(\text{C}-\text{H})$ aromatic, out-plane                             |
| 875     | 891    | $\nu_{\text{sym}}(\text{C}-\text{N}-\text{C})$ ring                         |
| 803     | 808    | $\delta(\text{N-H})$ , out of plane                                         |
| 793     | 791    | $\delta(\text{N-H})$ , out of plane                                         |
| 769     | 772    | $\delta(\text{N-H})$ , out of plane                                         |
| 724     | 719    | $\nu(\text{C}-\text{N}-\text{C})$                                           |
| 700     | 702    | $\delta$ aromatic, in-plane/ $\text{C-H}$ wag cis                           |
| 648     | 650    | $\delta(\text{O}-\text{C}-\text{N})$ ring/ $\delta(\text{C}=\text{O})$      |
| 621     | 618    | $\delta(\text{O}-\text{C}-\text{N})$ ring                                   |
| 583     | -----  | $\delta(\text{O}-\text{C}-\text{N})$                                        |
| 546     | 548    | $\delta$ aromatic, out-plane                                                |
| 539     | ---    | $\delta$ aromatic, out-plane                                                |
| 414     | 414    | Lattice vibration                                                           |
| 391     | 393    | Lattice vibration                                                           |
| 375     | 383    | Lattice vibration                                                           |
| 331     | 332    | Lattice vibration                                                           |
| 272     | ----   | Lattice vibration                                                           |
| 253     | 259    | Lattice vibration                                                           |
| 181     | ----   | Lattice vibration                                                           |
| 170     | 171    | Torsion                                                                     |
| ----    | 142    | Lattice vibration                                                           |
| 138     | 136    | Lattice vibration                                                           |
| 120     | ---    | Lattice vibration                                                           |
| ----    | 110    | Lattice vibration                                                           |
| 104     | ----   | Lattice vibration                                                           |
| 89      | ----   | Lattice vibration                                                           |
| 74      | 76     | Lattice vibration                                                           |

**Table S2:** Experimental infrared data and respective band assignment of CBZ III and CBZ DH.<sup>3-6</sup>

| CBZ III | CBZ DH | Assignments                           |
|---------|--------|---------------------------------------|
| 3463    | 3427   | $\nu(\text{NH}_2)$                    |
| -----   | 3371   | $\nu(\text{NH}_2)$                    |
| 3279    | 3328   | $\nu(\text{O-H})$                     |
| 3155    | 3180   | $\nu(\text{C-N-C})$ ring              |
| 1670    | 1678   | $\nu_{\text{sym}}(\text{C=O})$        |
| 1597    | 1592   | $\delta(\text{NH}_2)$                 |
| 1488    | 1492   | $\nu_{\text{sym}}(\text{C=C})$ ring   |
| -----   | 1404   | $\delta(\text{OH})$ crystalline water |
| 1376    | -----  | $\delta(\text{CH})$                   |
| 1307    | 1313   | $\nu_{\text{sym}}(\text{C-N})$        |
| 1039    | 1042   | $\delta(\text{N-H})$                  |

**Table S3:** Table S3: Percentage of CBZ III and CBZ DH in two tablet samples in function of time kept at 89% RH, as estimated by IR and Raman imaging.

| Time (h) | Sample I _MCR analysis |             | Sample II _CRM |             |
|----------|------------------------|-------------|----------------|-------------|
|          | % of CBZ III           | % of CBZ DH | % of CBZ III   | % of CBZ DH |
| 24       | >99                    | <1          | 100            | 0           |
| 48       | 95                     | 5           | >99            | <1          |
| 72       | 58                     | 42          | 91             | 9           |
| 96       | 44                     | 56          | 2              | 98          |
| 120      | 23                     | 77          | 0              | 100         |

**Table S4:** Estimated percentages of CBZ III and CBZ DH in tablets, by using the Raman maps, in comparison to the nominal amounts used in their preparation: 50%, 10% and 1% in CBZ DH.

| CBZ DH Nominal amount | CBZ III (CRM) | CBZ DH (CRM) |
|-----------------------|---------------|--------------|
| 50%                   | 59%           | 41%          |
| 10%                   | 94%           | 6%           |
| 1%                    | 99%           | 1%           |

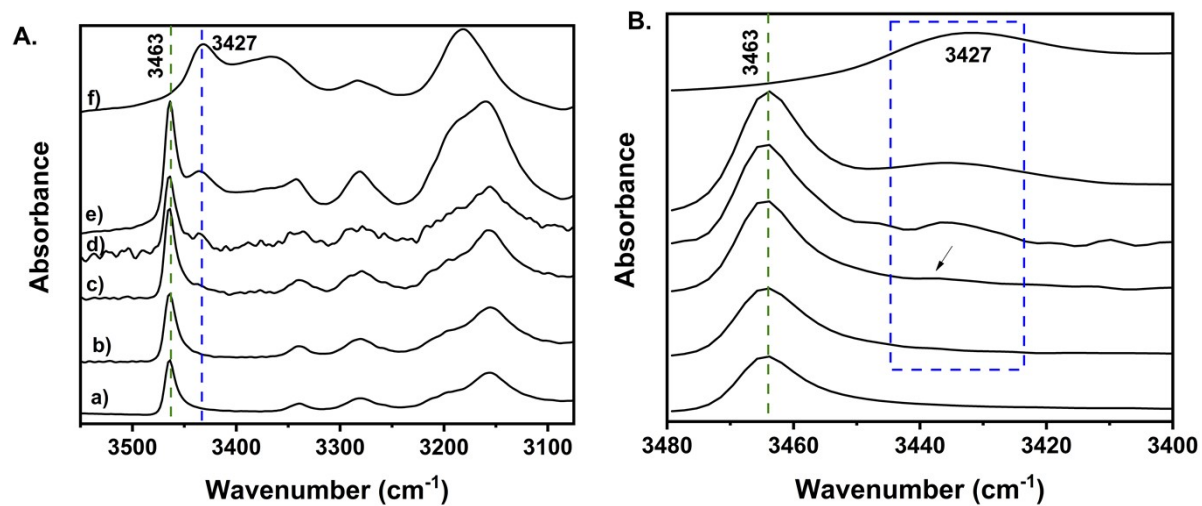

**Figure S1:** A) FTIR spectra of CBZ III tablet (a), CBZ III tablets with variable amount of CBZ DH: 0.5% (b), 1% (c), 10% (d) and 50% (e); CBZ DH (f). B) Magnification of the region 3480-3400  $\text{cm}^{-1}$ .

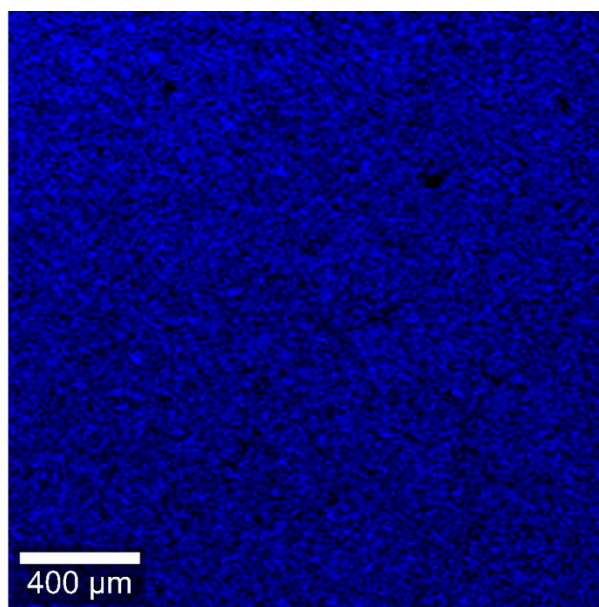

**Figure S2:** Combined Raman images of CBZ III tablet after 9 months exposed to RH 6% at room temperature.

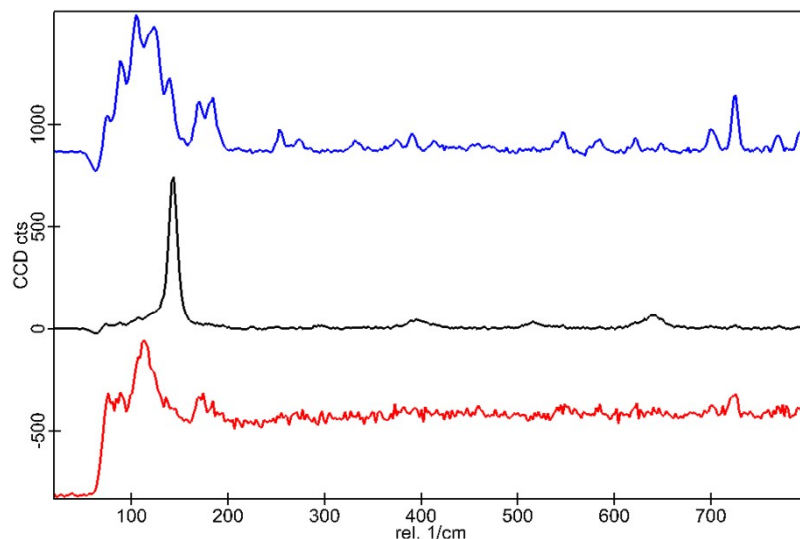

**Figure S3:** Average Raman spectra (range 20-800  $\text{cm}^{-1}$ ) of distinct regions mapped in the tablets (blue: CBZ III; black:  $\text{TiO}_2$ ; red: CBZ DH).

## References

- 1 L. E. O'Brien, P. Timmins, A. C. Williams and P. York, Use of in situ FT-Raman spectroscopy to study the kinetics of the transformation of carbamazepine polymorphs, *J. Pharm. Biomed. Anal.*, 2004, **36**, 335–340.
- 2 R. Prasad, K. Panwar, J. Katla and S. V. Dalvi, Polymorphism and Particle Formation Pathway of Carbamazepine during Sonoprecipitation from Ionic Liquid Solutions, *Cryst. Growth Des.*, 2020, **20**, 5169–5183.
- 3 C. J. Strachan, S. L. Howell, T. Rades and K. C. Gordon, A theoretical and spectroscopic study of carbamazepine polymorphs, *J. Raman Spectrosc.*, 2004, **35**, 401–408.
- 4 S. F. Barakh Ali, Z. Rahman, S. Dharani, H. Afroz and M. A. Khan, Chemometric Models for Quantification of Carbamazepine Anhydrous and Dihydrate Forms in the Formulation, *J. Pharm. Sci.*, 2019, **108**, 1211–1219.
- 5 M. Krstić, M. Popović, V. Dobričić and S. Ibrić, Influence of Solid Drug Delivery System Formulation on Poorly Water-Soluble Drug Dissolution and Permeability, *Molecules*, 2015, **20**, 14684–14698.
- 6 Y. Otsuka, A. Ito, S. Matsumura, M. Takeuchi and H. Tanaka, Effect of hydroxypropyl cellulose and hydroxypropyl methylcellulose on carbamazepine polymorphic transformation, , DOI:10.1007/s00396-015-3698-1.
